# Supplementary material for: DetecDiv, a generalist deep-learning platform for automated cell division tracking and survival analysis
Source: bioRxiv preprint, doi:10.1101/2021.10.05.463175, version 4 (2022-04-15)
Supplement: Supplemental Table T5 [file 463175_file09.xlsx]

## Sheet: CNN for fluo
	CNN	Value
	Images	3000
	classes	background, fluo
	Network	resnet50
	method	adam
	split	0.9
	freeze	n
	ExecutionEnvironment	multi-gpu
	GradientDecayFactor	0.9
	SquaredGradientDecayFactor	0.999
	Epsilon	1e-08
	InitialLearnRate	0.0003
	LearnRateScheduleSettings
		Method	piecewise
		DropRateFactor	0.7
		DropPeriod	2
	L2Regularization	0.001
	GradientThresholdMethod	l2norm
	MaxEpochs	10
	MiniBatchSize	128
	ValidationPatience	20
	Shuffle	every-epoch
	TranslateAugmentation	-5 5
	RotateAugmentation	-20 20
